# Supplementary material
Source: publisher site journal article supplement (https://www.dovepress.com/article/337606)
Supplement: Supplementary file 1 [file get_supplementary_file.php]

**Supplementary Table S1. Survival outcomes according to clinical characteristics and year of diagnosis**

|  | Soft tissue sarcomas | | | | Bone sarcomas | | | |
| --- | --- | --- | --- | --- | --- | --- | --- | --- |
|  | Number of patients | Death | 5-year survival  rate (%) | 95% confidence  interval | Number of patients | Death | 5-year survival  rate (%) | 95% confidence  interval |
| Overall | 2661 | 428 | 78.3 | 76.2–80.3 | 759 | 123 | 82.0 | 78.5–85.0 |
| Sex |  |  |  |  |  |  |  |  |
| Male | 1212 | 234 | 74.3 | 71.0–77.3 | 400 | 73 | 80.2 | 75.2–84.4 |
| Female | 1449 | 194 | 81.7 | 79.0–84.2 | 359 | 50 | 84.0 | 79.0–88.0 |
| Age at diagnosis |  |  |  |  |  |  |  |  |
| AYA (16–29) | 303 | 41 | 82.3 | 76.1–87.1 | 280 | 45 | 81.5 | 75.4–86.2 |
| Adult (30–64) | 1885 | 282 | 80.5 | 78.2–82.6 | 412 | 59 | 85.1 | 80.6–88.6 |
| Elderly (≥65) | 473 | 105 | 64.4 | 57.6–70.4 | 67 | 19 | 62.7 | 45.7–75.7 |
| Primary site |  |  |  |  |  |  |  |  |
| Head and neck | 157 | 31 | 75.6 | 65.6–83 | 61 | 11 | 80.8 | 66–89.7 |
| Thorax | 393 | 82 | 71.7 | 65.4–77.1 | 83 | 23 | 64.9 | 50.6–76 |
| Abdomen | 759 | 133 | 76.0 | 71.8–79.7 | 41 | 14 | 49.6 | 27.2–68.5 |
| GU/GYN | 492 | 76 | 80.0 | 75.3–84 | 11 | 2 | 78.7 | 38.1–94.3 |
| Extremities and skeleton | 781 | 99 | 82.9 | 79.1–86 | 498 | 60 | 87.0 | 83.1–90.1 |
| Others | 45 | 5 | 85.2 | 67.4–93.7 | 63 | 13 | 82.1 | 69.2–90 |
| Unknown | 34 | 2 | 92.4 | 72.8–98.1 | 2 | 0 | 100 | NA |
| Initial treatment |  |  |  |  |  |  |  |  |
| Surgically treated patients | n = 2470 |  |  |  | n = 694 |  |  |  |
| Surgery only | 1727 | 242 | 81.4 | 78.9–83.6 | 502 | 47 | 90.3 | 86.8–92.9 |
| Neoadjuvant chemotherapy → surgery ± radiotherapy | 49 | 14 | 67.0 | 47.5–80.6 | 82 | 15 | 80.5 | 68.4–88.3 |
| Surgery → adjuvant chemotherapy ± radiotherapy | 404 | 82 | 74.6 | 68.7–79.5 | 79 | 25 | 67.3 | 53.1–78.0 |
| Surgery with perioperative radiotherapy | 290 | 35 | 83.3 | 76.9–88.1 | 31 | 4 | 85.0 | 64.8–94.1 |
| Non-surgically treated patients | n = 181 |  |  |  | n = 62 |  |  |  |
| Chemotherapy only | 113 | 35 | 39.3 | 23.4–54.9 | 36 | 22 | 16.2 | 4.4–34.7 |
| Radiotherapy only | 35 | 5 | 49.7 | 12.8–78.8 | 7 | 1 | 85.7 | 33.4–97.9 |
| Chemotherapy and radiotherapy | 33 | 15 | 40.9 | 20.5–60.3 | 19 | 7 | 36.7 | 7.4–67.9 |
| Diagnosis year |  |  |  |  |  |  |  |  |
| Pre-2000 | 286 | 107 | 60.6 | 53.7–66.7 | 105 | 31 | 74.8 | 64.4–82.6 |
| 2000–2009 | 929 | 265 | 70.1 | 66.9–73.2 | 293 | 77 | 74.8 | 69.0–79.6 |
| 2010–2017 | 1446 | 56 | 92.7 | 89.9–94.8 | 361 | 15 | 93.4 | 89.0–96.1 |
| Histology – Soft tissue |  |  |  |  |  |  |  |  |
| Adipocytic tumor |  |  |  |  |  |  |  |  |
| Atypical lipomatous tumor/Well differentiated liposarcoma | 135 | 8 | 93.0 | 85.6–96.6 | - | - | - | - |
| Dedifferentiated liposarcoma | 102 | 6 | 88.6 | 75.9–94.8 | - | - | - | - |
| Myxoid liposarcoma | 106 | 10 | 88.0 | 76.5–94.1 | - | - | - | - |
| Fibroblastic/myofibroblastic tumor |  |  |  |  |  |  |  |  |
| Desmoids-type fibromatosis | 183 | 4 | 96.5 | 90.9–98.7 | - | - | - | - |
| Dermatofibrosarcoma protuberans | 117 | 0 | 100.0 | NE | - | - | - | - |
| So-called fibrohistiocytic tumors |  |  |  |  |  |  |  |  |
| Giant cell tumor of soft tissue | 124 | 1 | 98.4 | 88.9–99.8 | - | - | - | - |
| Smooth muscle tumor |  |  |  |  |  |  |  |  |
| Leiomyosarcoma | 346 | 74 | 72.1 | 65.4–77.7 | - | - | - | - |
| Vascular tumor |  |  |  |  |  |  |  |  |
| Angiosarcoma of soft tissue | 106 | 33 | 41.6 | 25.1–57.3 | - | - | - | - |
| Nerve sheath tumor (MPNST) |  |  |  |  |  |  |  |  |
| MPNST | 84 | 11 | 46.9 | 12.0–76.3 | - | - | - | - |
| Tumors of uncertain differentiation |  |  |  |  |  |  |  |  |
| Synovial sarcoma | 123 | 37 | 64.8 | 54.0–73.7 | - | - | - | - |
| Undifferentiated/unclassified sarcomas |  |  |  |  |  |  |  |  |
| Undifferentiated pleomorphic sarcoma | 208 | 58 | 63.7 | 55.0–71.3 | - | - | - | - |
| Undifferentiated spindle cell sarcoma | 146 | 7 | 94.9 | 87.7–97.9 | - | - | - | - |
| Histology – Bone |  |  |  |  |  |  |  |  |
| Chondrogenic tumors |  |  |  |  |  |  |  |  |
| Chondrosarcoma | - | - | - | - | 84 | 5 | 92.0 | 81.7–96.6 |
| Atypical cartilaginous tumor / chondrosarcoma grade1 | - | - | - | - | 79 | 5 | 94.5 | 86.1–97.9 |
| Osteogenic tumors |  |  |  |  |  |  |  |  |
| Conventional osteosarcoma | - | - | - | - | 142 | 35 | 69.6 | 59.4–77.7 |
| Osteoclastic giant cell-rich tumors |  |  |  |  |  |  |  |  |
| Giant cell tumor of bone | - | - | - | - | 156 | 0 | 100.0 | NE |
| Notochordal tumors |  |  |  |  |  |  |  |  |
| Chordoma | - | - | - | - | 52 | 10 | 87.9 | 73.1–94.8 |
| Ewing sarcoma | - | - | - | - | 135 | 50 | 57.5 | 46.7–66.9 |

**Abbreviations**: AYA, adolescents and young adults; GU/GYN, genitourinary and gynecologic; MPNST, malignant Peripheral Nerve Sheath Tumor.
